# Supplementary material
Source: publisher site journal article supplement (https://www.dovepress.com/article/308353)
Supplement: Supplementary file 1 [file get_supplementary_file.php]

***Supplementary information***

**An indole-2-carboxamide derivative, LG4, alleviates diabetic kidney disease through inhibiting MAPK-mediated inflammatory responses**

Jianchang Qian, Sihui Yin, Lin Ye, Yujing Chen, Zhe Wang, Sheng Shu, Zhenxing Mou, Mingjiang Xu, Nipon Chattipakorn, Zhiguo Liu, Guang Liang

Content:

1. Description of the chemical synthesis of LG4-Biotin
2. Supplementary Figures and Table.

**Description of the chemical synthesis of LG4-biotin-**

**Synthesis of 5-(4-methylpiperazin-1-yl)-2-nitrophenol (2)**

To a solution of commercially available 1-(3-methoxy-4-nitrophenyl)-4-methylpiperazine (**1**) (1.6 g, 6.3 mmol) in acetic acid (15 mL) was added 5.0 mL of hydrobromic acid at room temperature slowly, the reaction mixture was allowed to stir at 105oC. The reaction was detected by TLC, the resulting solution was quenched with brine (20 mL) and extracted with AcOEt (3×30 mL). The organic layers were dried over MgSO4 and concentrated at reduced pressure. The residue was purified by chromatography on silica gel to give compound **2** (0.85 g, 47.1%) as a yellow powder. 1H NMR (500 MHz, MeOD) δ 7.92 (d, *J* = 9.7 Hz, 1H), 6.60 (d, *J* = 9.7 Hz, 1H), 6.41 (s, 1H), 3.63 -3.41 (m, 4H), 2.65-2.48 (m, 4H), 2.35 (s, 3H). 13C NMR (126 MHz, MeOD) δ 158.98 (s), 158.24 (s), 128.08 (s), 125.95 (s), 108.20 (s), 100.63 (s), 55.47 (s), 47.33 (s), 46.02 (s). ESI-MS m/z : 238.29 (M+H)+.

**Synthesis of *tert*-butyl {2-{2-{2-[5-(4-methylpiperazin-1-yl)-2-nitrophenoxy]ethoxy}ethoxy}ethyl}carbamate (3)**

To a solution of 5-(4-methylpiperazin-1-yl)-2-nitrophenol (**2**) (0.9 g, 3.8 mmol) in dry DMF (10 mL) was added K2CO3 (1.57 g, 11.4 mmol) at 70 oC followed by previously prepared tert-butyl (2-(2-(2-bromoethoxy)ethoxy)ethyl)carbamate (1.42 g, 4.30 mmol) and the mixture was stirred at this temperature for 10 h. The resulting solution was quenched with brine (20 mL) and extracted with AcOEt (3×20 mL). The organic layers were dried over MgSO4 and concentrated at reduced pressure. The residue was purified by chromatography on silica gel to give compound **2** (0.85 g, 31.7%) as a yellow oily liquid. 1H NMR (500 MHz, CDCl3) δ 7.96 (d, *J* = 9.3 Hz, 1H), 6.48-6.30 (m, 2H), 4.23 (t, *J* = 4.7 Hz, 2H), 4.10 (d, *J* = 7.1 Hz, 1H), 3.92 (t, *J* = 4.7 Hz, 2H), 3.80 – 3.73 (m, 2H), 3.65-3.58 (m, 2H), 3.52 (t, *J* = 5.1 Hz, 2H), 3.44-3.35 (m, 4H), 3.29 (d, *J* = 4.5 Hz, 2H), 2.61 – 2.50 (m, 4H), 2.36 (s, 3H), 1.41 (s, 9H). 13C NMR (101 MHz, CDCl3) δ 156.17-154.74 (m), 154.74 – 154.55 (m), 129.87 (s), 128.53 (s), 105.94 (s), 98.86 (s), 79.01 (s), 77.40 (s), 77.08 (s), 76.76 (s), 70.97 (s), 70.43 – 69.49 (m), 69.34 (s), 54.24 (s), 46.69 (s), 45.70 (s), 40.27 (s), 28.34 (s). ESI-MS m/z : 469.32 (M+H)+.

**Synthesis of2-{2-{2-[5-(4-methylpiperazin-1-yl)-2-nitrophenoxy]ethoxy}ethoxy}ethanamine(4)**

To a solution of *tert*-butyl {2-{2-{2-[5-(4-methylpiperazin-1-yl)-2-nitrophenoxy]ethoxy}ethoxy}ethyl}carbamate (**3**) (0.5 g, 1.07 mmol) in dry trifluoroacetic acid (5 mL) was added triisopropylsilane (3 drops) and water (3 drops) at room temperature. After 1 h, the resulting mixture was alkalized to pH 8 with K2CO3. The solution was extracted with AcOEt (3×20 mL) and washed by brine (50 mL). The organic layers were dried over MgSO4 and concentrated at reduced pressure. The residue was purified by chromatography on silica gel to give compound **4** (0.36 g, 92.3%) as a yellow oily liquid.1H NMR (500 MHz, MeOD) δ 7.96 (d, *J* = 9.3 Hz, 1H), 6.72 – 6.46 (m, 2H), 4.36 – 4.25 (m, 2H), 3.99 – 3.88 (m, 2H), 3.84 – 3.79 (m, 2H), 3.72 (t, *J* = 4.9 Hz, 4H), 3.52 – 3.44 (m, 4H), 3.14 – 3.06 (m, 2H), 2.65 – 2.55 (m, 4H), 2.38 (s, 3H).13C NMR (126 MHz, MeOD) δ 157.12 (s), 156.88 (s), 131.05 (s), 129.37 (s), 107.10 (s), 100.10 (s), 72.75 (s), 72.02 (s), 71.35 (s), 70.67 (d, *J* = 17.4 Hz), 55.61 (s), 47.78 (s), 46.12 (s), 41.98 (s). ESI-MS m/z: 369.07 (M+H)+.

**Synthesis of *N*-{2-{2-{2-[5-(4-methylpiperazin-1-yl)-2-nitrophenoxy]ethoxy}ethoxy}ethyl}-5-{(3aS,4S,6aR)-2-oxohexahydro-*1H*-thieno[3,4-d]imidazol-4-yl}pentanamide (5)**

A solution of 2-{2-{2-[5-(4-methylpiperazin-1-yl)-2-nitrophenoxy]ethoxy}ethoxy}ethanamine (**4**) (0.34 g, 0.92 mmol) and D-Biotin (0.34 mg, 1.38 mmol) in dry DMF (5 mL) was added HATU (0.42 g, 1.1 mmol) and HOBT (0.13 g, 0.92 mmol) portionwise, followed by DIPEA (0.33 mg, 2.59 mmol) at room temperature. After 16 h, The resulting solution was quenched with water (10 mL) and extracted with AcOEt (3×10 mL). The organic layers were dried over MgSO4 and concentrated at reduced pressure. The residue was purified by chromatography on silica gel to give compound **5** (0.18 g, 32.1%) as a yellow powder. 1H NMR (400 MHz, MeOD) δ 7.98 (d, *J* = 9.6 Hz, 1H), 6.65 (d, *J* = 8.0 Hz, 2H), 4.52 (dd, *J* = 7.8, 4.9 Hz, 1H), 4.37 – 4.28 (m, 3H), 4.01 – 3.90 (m, 2H), 3.81 (dd, *J* = 5.5, 3.5 Hz, 2H), 3.69 (dd, *J* = 5.6, 3.5 Hz, 2H), 3.58 (dt, *J* = 10.3, 5.2 Hz, 6H), 3.39 (t, *J* = 5.4 Hz, 2H), 3.36 (dt, *J* = 3.2, 1.6 Hz, 4H), 3.27 – 3.16 (m, 1H), 2.96 (dd, *J* = 12.8, 5.0 Hz, 1H), 2.85 – 2.78 (m, 4H), 2.75 (s, 1H), 2.22 (d, *J* = 7.2 Hz, 2H), 1.83 – 1.53 (m, 4H), 1.45 (dd, *J* = 15.3, 7.6 Hz, 2H).13C NMR (126 MHz, MeOD) δ 176.15 (s), 156.75 (d, *J* = 19.0 Hz), 131.46 (s), 129.46 (s), 107.50 (s), 100.69 (s), 71.98 (s), 71.38 (s), 70.79 (d, *J* = 25.3 Hz), 70.63 (s), 63.38 (s), 61.68 (s), 57.03 (s), 55.06 (s), 47.08 (s), 45.22 (s), 41.16 (s), 40.41 (s), 36.83 (s), 29.76 (s), 29.53 (s), 26.86 (s). ESI-MS m/z : 595.45 (M+H)+.

**Synthesis ofN-(2-(2-(3-(2-amino-5-(4-methylpiperazin-1-yl)phenoxy)propoxy)ethoxy)ethyl)-5-((3aS,4S,6aR)-2-oxohexahydro-1H-thieno[3,4-d]imidazol-4-yl)pentanamide (6)**

To a solution of N-{2-{2-{2-[5-(4-methylpiperazin-1-yl)-2-nitrophenoxy]ethoxy}ethoxy}ethyl}-5-{(3aS,4S,6aR)-2-oxohexahydro-*1H*-thieno[3,4-d]imidazol-4-yl}pentanamide (**5**) (0.50 g, 0.85 mmol) in 10 mL MeOH-H2O (3:1) was added iron powder (0.47 g, 8.46 mmol) and ammonium chloride (0.45 g, 8.46 mmol) slowly. The mixture was stirred at 80 oC for 2h. The resulting mixture was filtered and the filtrate was concentrated under reduced pressure, the residue was purified by chromatography on silica gel to give compound **6** (0.43 g, 91.2%) as a yellow powder. 1H NMR (500 MHz, MeOD) δ 6.73 (t, *J* = 12.4 Hz, 1H), 6.62 (s, 1H), 6.54 – 6.38 (m, 1H), 5.49 (s, 2H), 4.83 (s, 6H), 4.44 (dd, *J* = 7.5, 4.9 Hz, 1H), 4.24 (dd, *J* = 7.7, 4.4 Hz, 1H), 4.14 (s, 2H), 3.88 – 3.80 (m, 2H), 3.71 (dd, *J* = 5.5, 3.2 Hz, 2H), 3.64 (dd, *J* = 5.4, 3.1 Hz, 2H), 3.55 (dd, *J* = 11.1, 5.6 Hz, 2H), 3.38 – 3.33 (m, 2H), 3.17 – 3.04 (m, 4H), 2.88 (dd, *J* = 12.7, 4.9 Hz, 1H), 2.67 (d, *J* = 12.9 Hz, 5H), 2.38 (s, 3H), 2.17 (t, *J* = 7.3 Hz, 2H), 1.61 (tdd, *J* = 30.4, 14.5, 8.0 Hz, 4H), 1.38 (dt, *J* = 14.9, 7.4 Hz, 2H).13C NMR (126 MHz, MeOD) δ 176.17 (s), 148.87 (s), 146.08 (s), 117.74 (s), 112.02 (s), 105.98 (s), 71.69 (s), 71.29 (s), 70.95 (s), 70.64 (s), 69.84 (s), 63.37 (s), 61.64 (s), 56.97 (s), 56.15 (s), 51.94 (s), 46.10 (s), 41.04 (s), 40.37 (s), 36.78 (s), 29.73 (s), 29.49 (s), 26.82 (s). ESI-MS m/z : 565.21 (M+H)+.

**Synthesis of 1-(4-bromobenzyl)-N-(4-(4-methylpiperazin-1-yl)-2-(2-(2-(2-(5-((3aS,4S,6aR)-2-oxohexahydro-1H-thieno[3,4-d]imidazol-4-yl)pentanamido)ethoxy)ethoxy)ethoxy)phenyl)-5-nitro-1H-indole-2-carboxamide (LG4)**

To a solution of previously prepared 1-(4-bromobenzyl)-5-nitro-1H-indole-2-carboxylic acid (0.16 g, 4.14 mmol) in DMF (5 mL) was added TBTU (0.13 g, 3.31 mmol) and DIPEA (0.10 g, 7.73 mmol) portionwise, followed by N-(2-(2-(3-(2-amino-5-(4-methylpiperazin-1-yl)phenoxy)propoxy)ethoxy)ethyl)-5-((3aS,4S,6aR)-2-oxohexahydro-1H-thieno[3,4-d]imidazol-4-yl)pentanamide (**6**) (0.16 g, 0.27 mmol) slowly at room temperature. The reaction was detected by TLC, the resulting solution was quenched with brine (10 mL) and extracted with AcOEt (3×10 mL). The organic layers were dried over MgSO4 and concentrated at reduced pressure. The residue was purified by chromatography on silica gel to give target compound **LG4** (51 mg, 20.3%) as a yellow powder.1H NMR (500 MHz, DMSO) δ 9.54 (s, 1H), 8.73 (d, *J* = 1.5 Hz, 1H), 8.12 (dd, *J* = 9.2, 2.1 Hz, 1H), 7.80 – 7.66 (m, 2H), 7.56 (s, 1H), 7.47 (d, *J* = 8.3 Hz, 3H), 7.08 (d, *J* = 8.3 Hz, 2H), 6.69 (s, 1H), 6.57 – 6.48 (m, 1H), 6.33 (d, *J* = 19.8 Hz, 2H), 5.90 (s, 2H), 4.31 – 4.26 (m, 1H), 4.17 – 4.08 (m, 3H), 3.74 – 3.67 (m, 2H), 3.58 – 3.52 (m, 2H), 3.46 – 3.40 (m, 2H), 3.19 – 3.03 (m, 8H), 2.80 (dd, *J* = 12.4, 5.0 Hz, 1H), 2.57 (d, *J* = 12.4 Hz, 1H), 2.44 (d, *J* = 4.4 Hz, 4H), 2.22 (s, 3H), 2.02 (t, *J* = 7.3 Hz, 2H), 1.63 – 1.53 (m, 1H), 1.43 (dd, *J* = 30.0, 7.0 Hz, 3H), 1.26 (dd, *J* = 17.0, 9.3 Hz, 4H).13C NMR (126 MHz, DMSO) δ 172.06 (s), 165.98 (s), 162.66 (s), 151.92 (s), 149.95 (s), 141.86 (s), 140.62 (s), 137.29 (s), 135.27 (s), 131.39 (s), 128.86 (s), 125.18 (d, *J* = 8.9 Hz), 120.39 (s), 119.03 (s), 118.86 (s), 118.30 (s), 111.74 (s), 107.77 (s), 107.35 (s), 101.88 (s), 69.85 (s), 69.49 (s), 69.05 (d, *J* = 11.9 Hz), 68.69 (s), 61.02 (s), 59.20 (s), 55.36 (s), 54.56 (s), 48.24 (s), 47.00 (s), 45.73 (s), 38.32 (s), 35.05 (s), 28.06 (d, *J* = 17.5 Hz), 25.18 (s). ESI-MS m/z :921.35(M+H)+,calcd for C43H53BrN8O8S,found 920.29.

**Supplementary Figures and Table**

**Supplementary Figure S1.** The synthetic route of LG4-biotin.


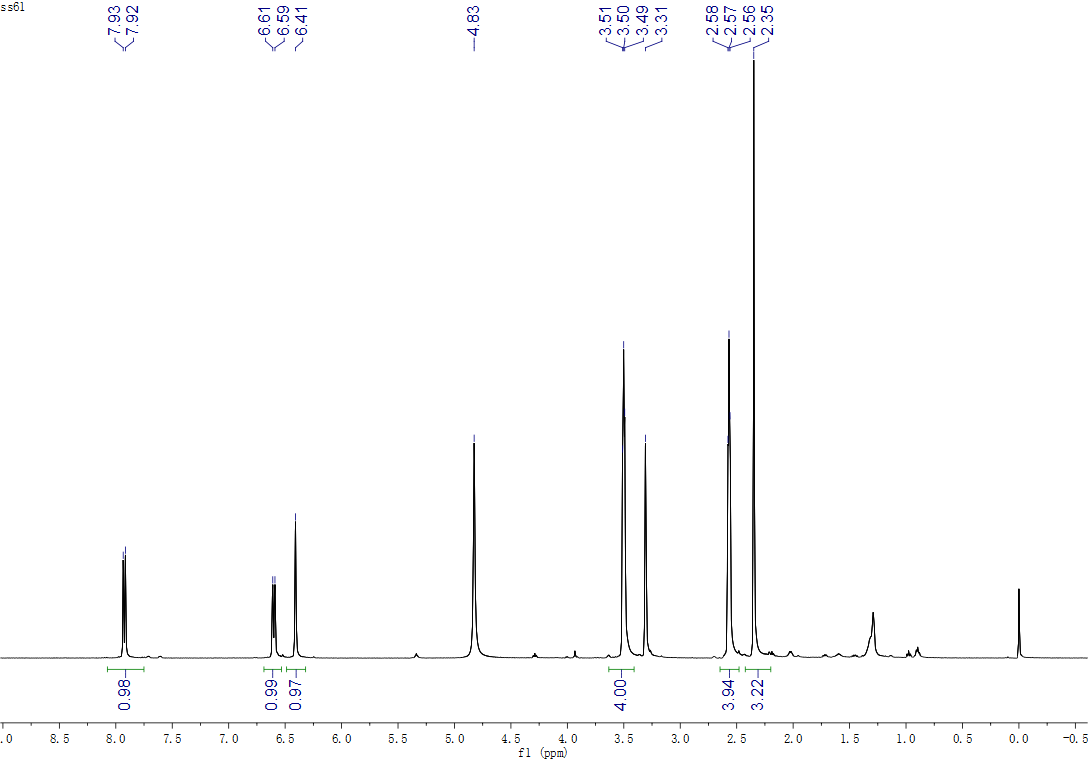


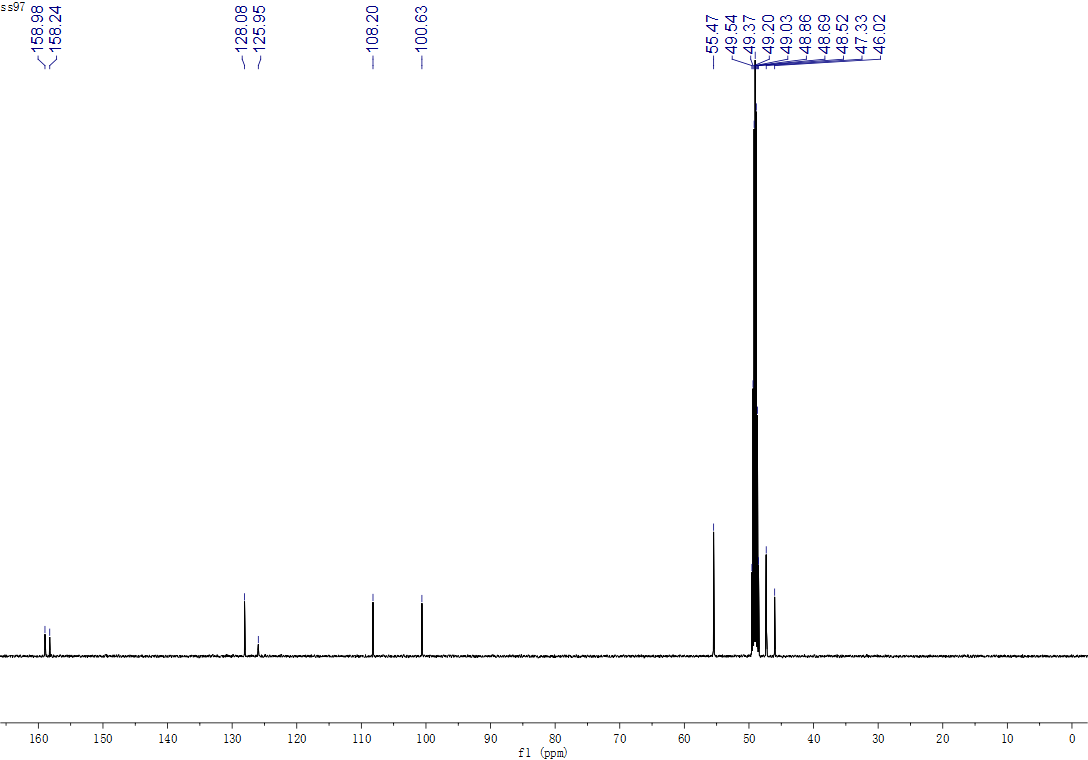


**Supplementary Figure S2.** The 1H NMR and 13C NMR data of compound 2.


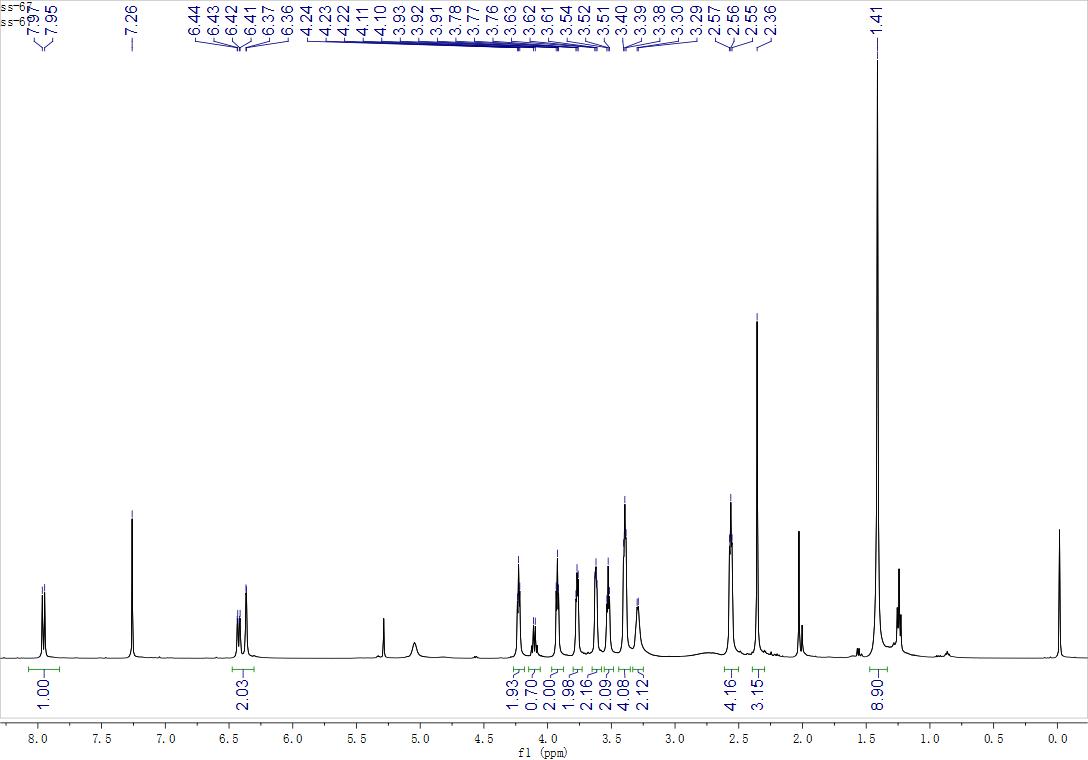


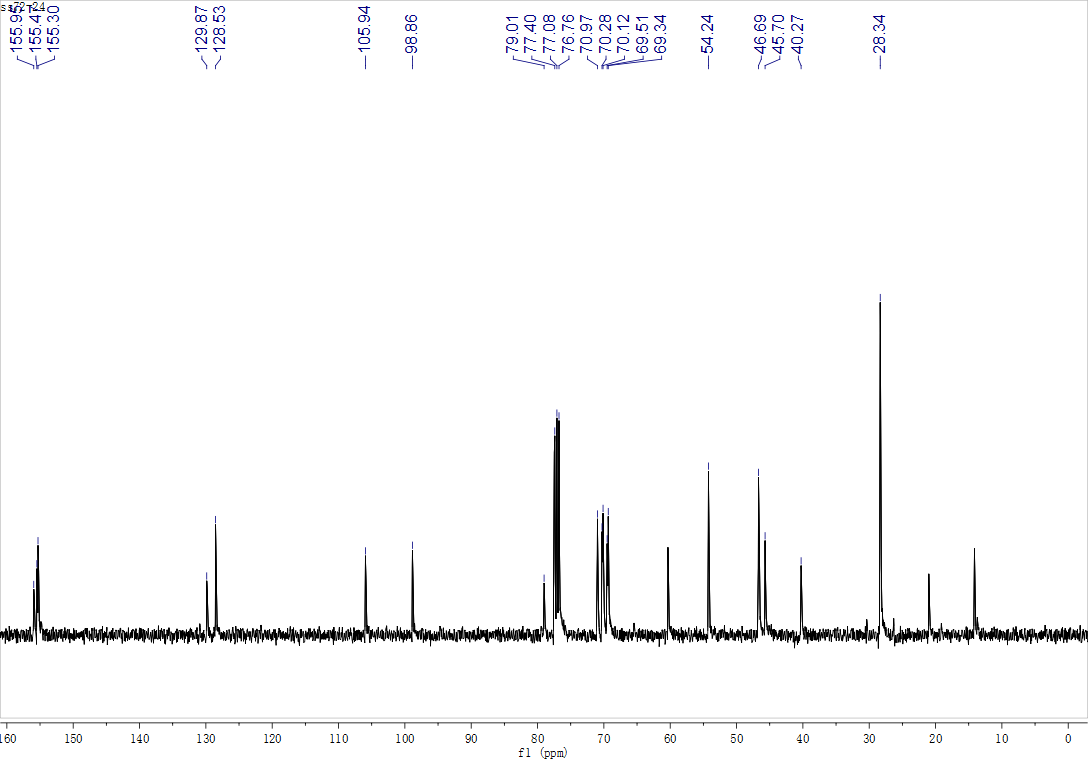


**Supplementary Figure S3**. The 1H NMR and 13C NMR data of compound 3.


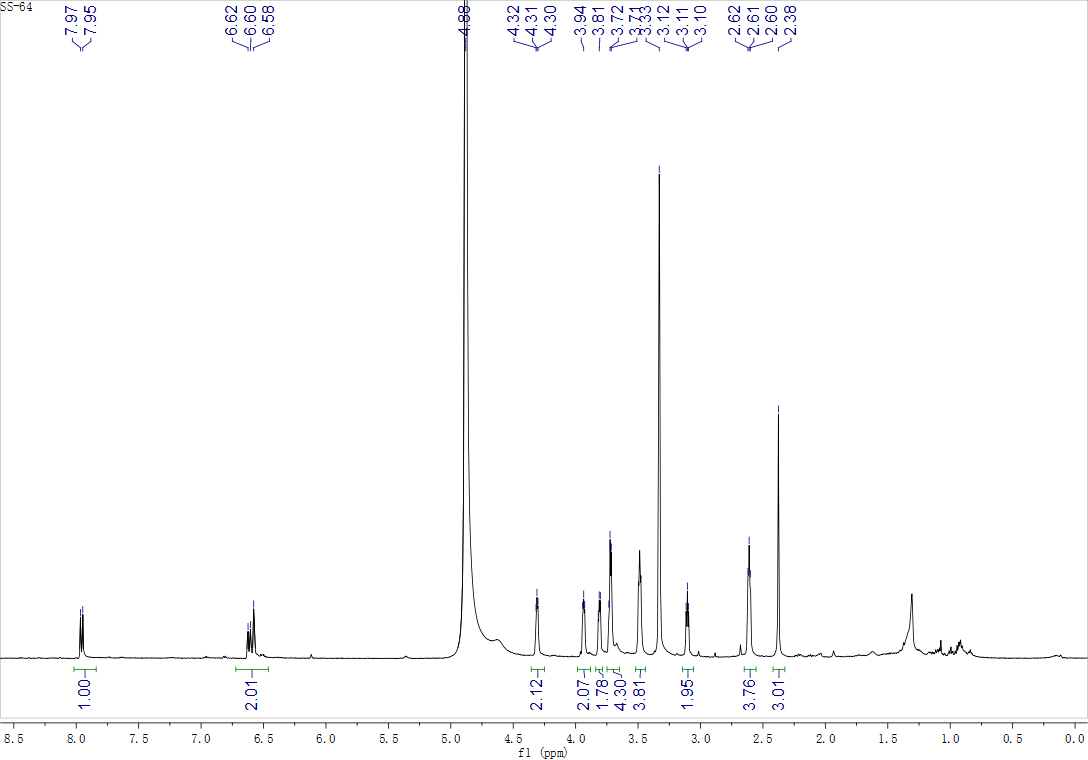


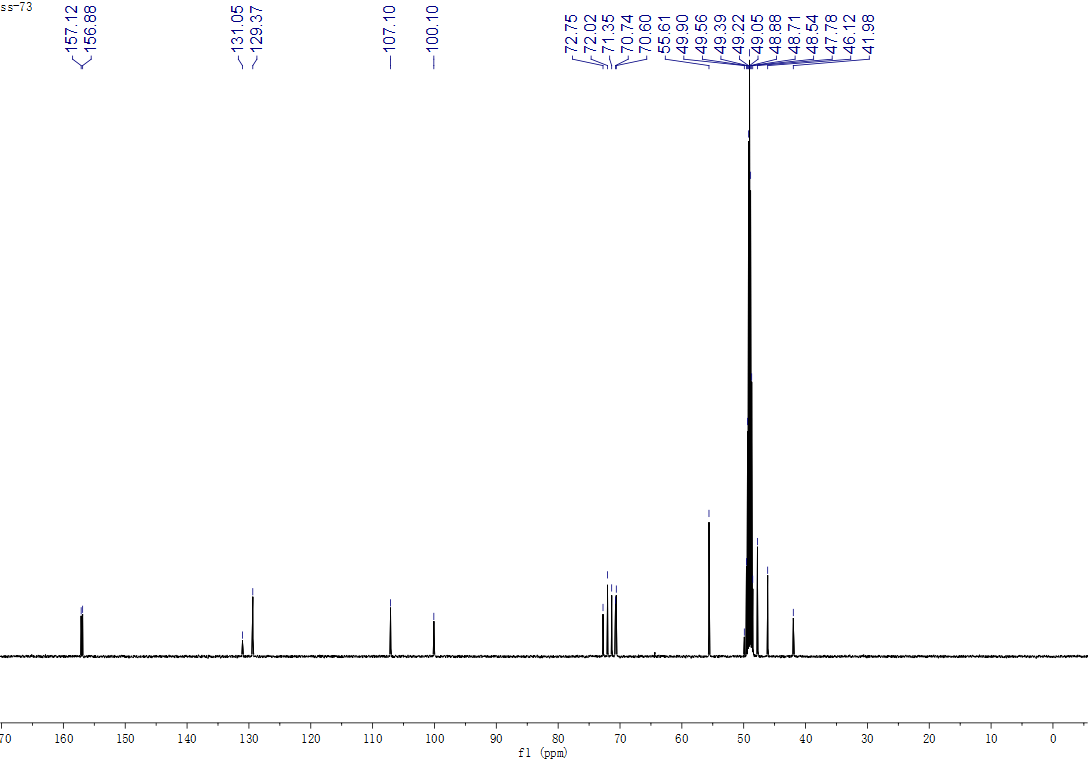


**Supplementary Figure S4.** The 1H NMR and 13C NMR data of compound 4.


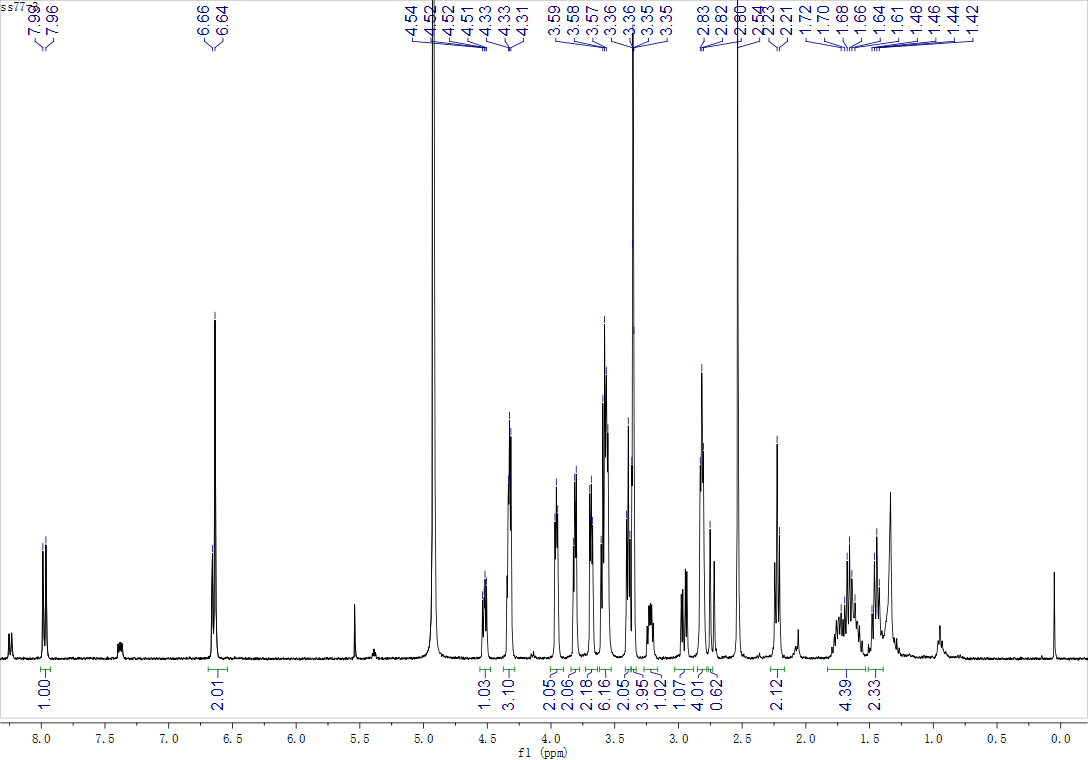


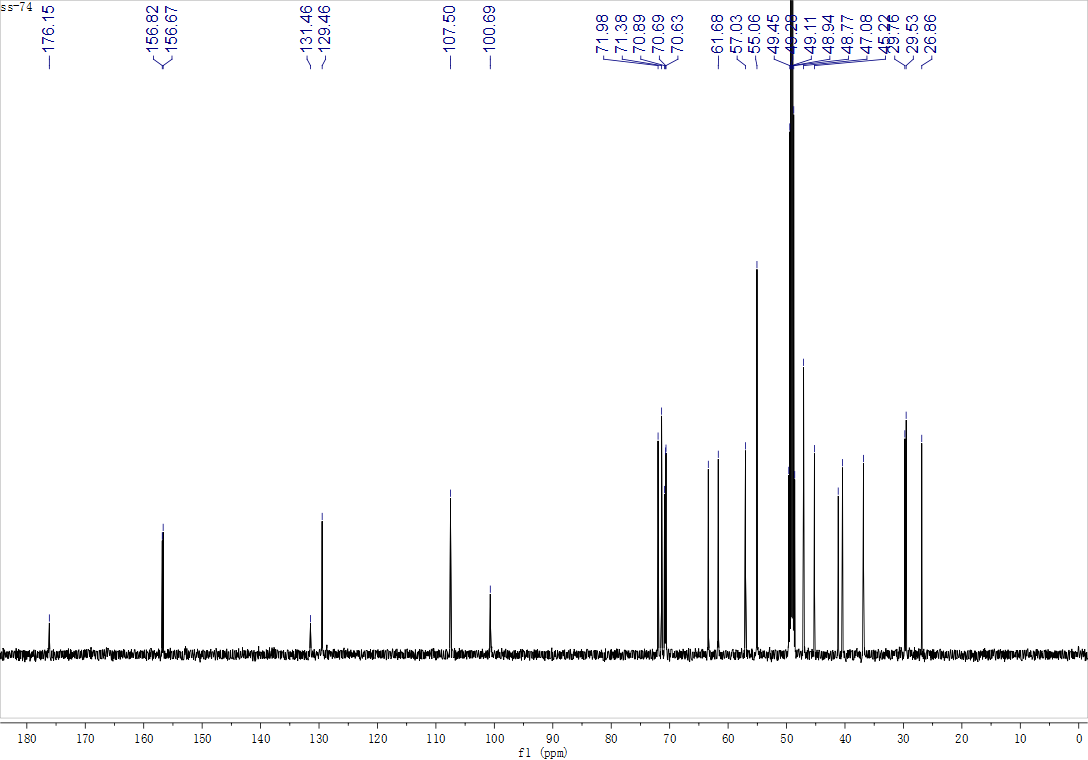


**Supplementary Figure S5**. The 1H NMR and 13C NMR data of compound 5.


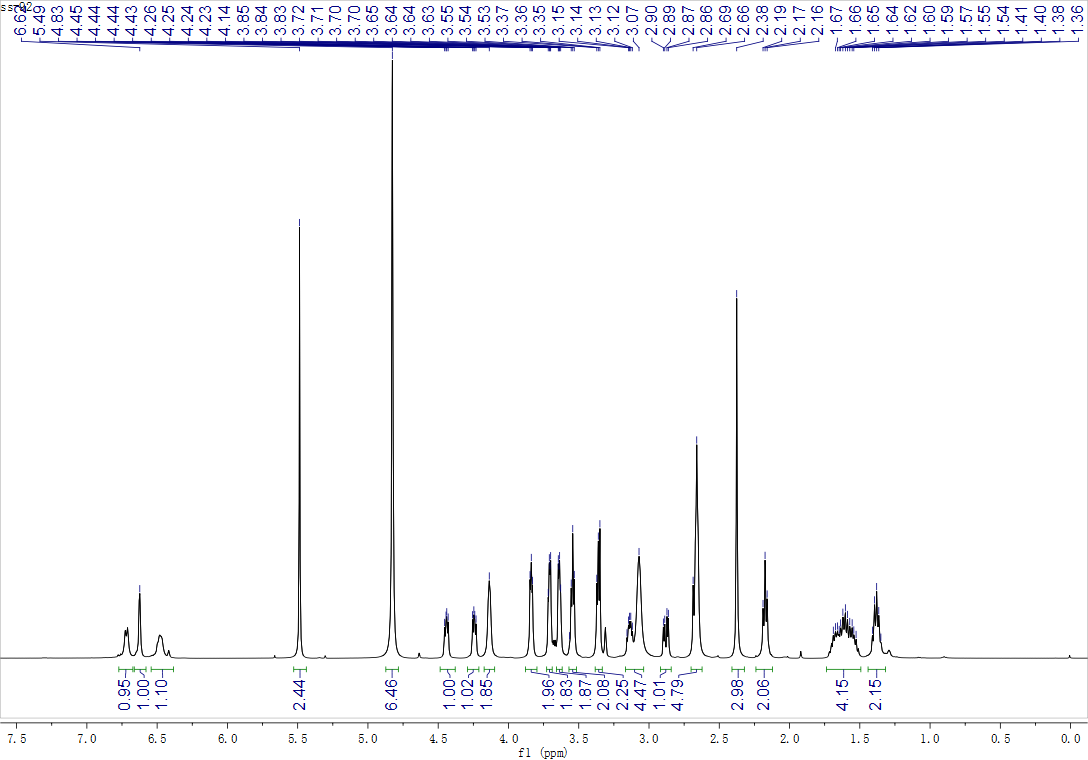


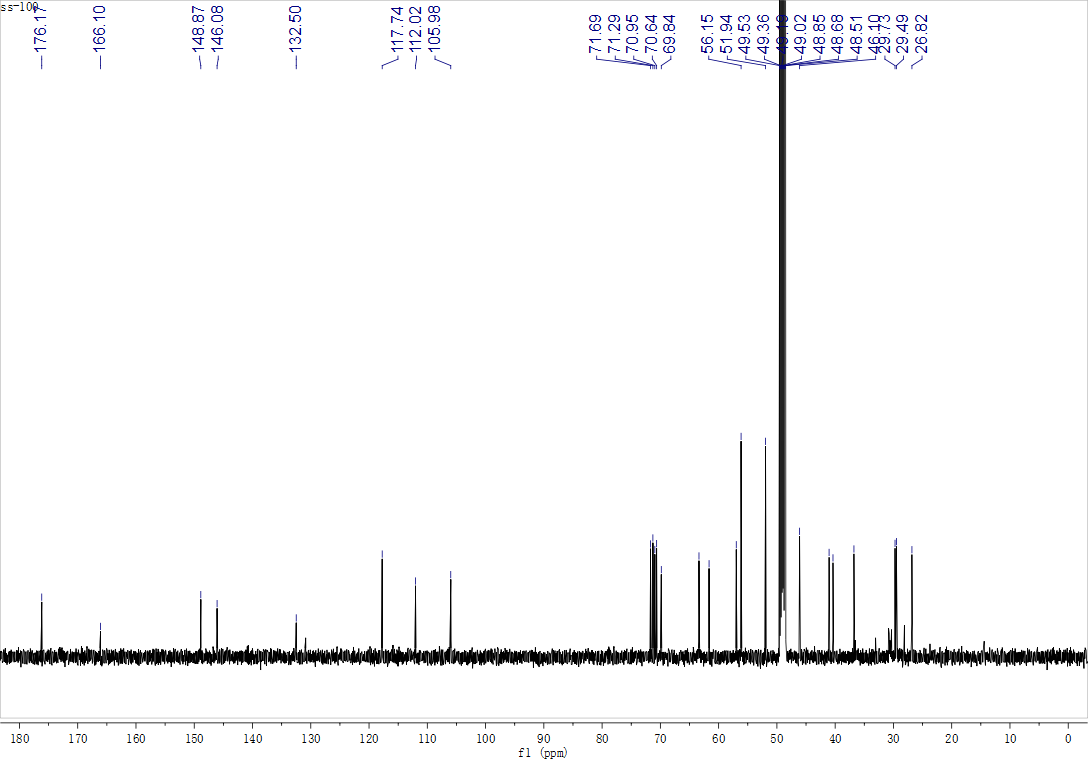


**Supplementary Figure S6.** The 1H NMR and 13C NMR data of compound 6.


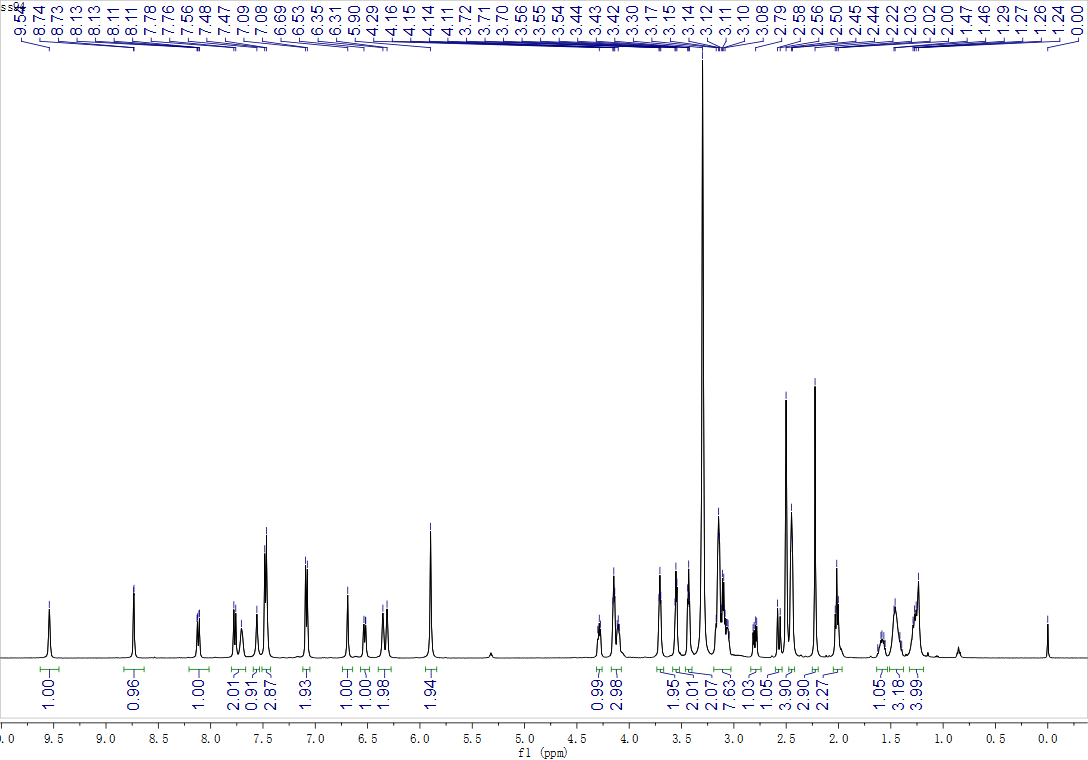


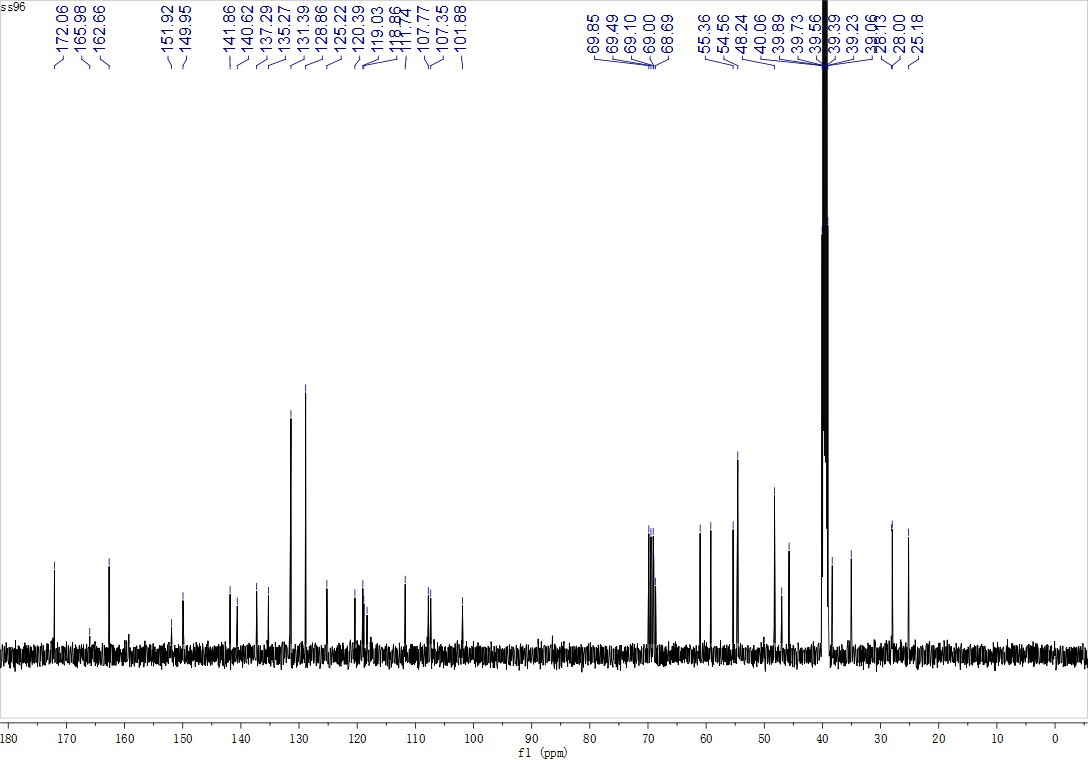


**Supplementary Figure S7.** The 1H NMR and 13C NMR data of compound 7 (LG4-biotin).


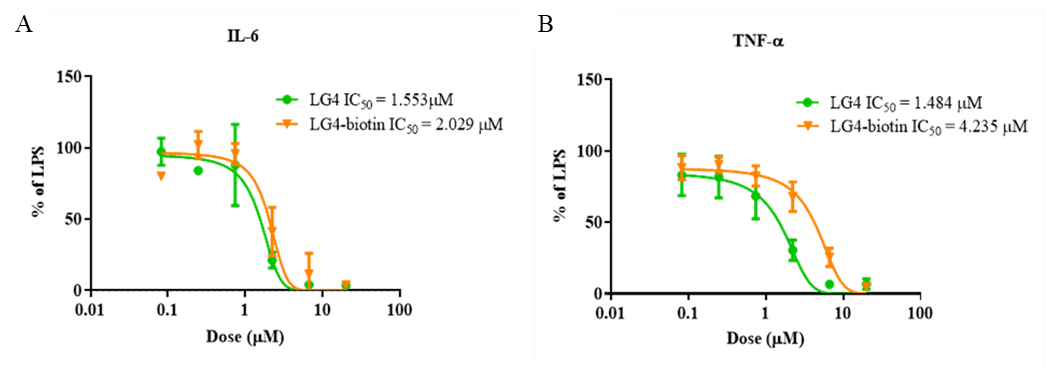


**Supplementary Figure S8.** The effects of LG4 and LG4-biotin on the LPS-induced production of inflammatory cytokines. Mouse primary peritoneal macrophage (MPM) was prepared according to method previous (Qian JC, et al. Toxicology Letters, 2019). Incubated MPMs cells with LPS (0.5 μg/mL) for 1h, then cotreated cells with various dose of LG4. 24 hours later, the medium of each group was harvest, and subjected to ELISA (eBioscience, San Diego, CA) assay as manufactory instruction determining IL-6 (A) and TNF-α (B). The final data was related to the LPS group and plotted.

**Supplementary Figure S9.** In vitro pharmacokinetic study of LG4. UPLC-MS/MS method was developed and applied to determined the concentration of LG4 and internal standard diazepam. The chromatographic separation was performed on an ACQUITY UPLC BEH C18 column (2.1 mm×100 mm, 1.7μm, Waters Corp., USA). The mobile phase was composed of 0.1% formic acid aqueous solution and acetonitrile. The column temperature was set at 40°C. The injection volume was 2 μL with the flow rate of 0.4 mL/min. The total elution time was 2 min, and the ESI+ electrospray mode was used. Finally, MRM mass spectrum information acquisition mode was used to detect analytes. The reaction system was consisted of LG4 (5 μM), rat liver microsome (0.2 mg/mL), PBS buffer (1M, pH=7.4) with or without NADPH (1 mM) to the final volume of 200 μL. The rat liver microsome and NADPH was excluded in the control group. 40 minutes reaction was carried out at 37 ℃, and terminated by cooling to -80℃. Add 200 μL acetonitrile and 20 μL 200 ng/mL diazepam into the tube, then vortex for 2min, following by centrifuging at 13000rpm for 10min. 2μL supernatant was removed and used for UPLC-MS/MS analysis. ***P* < 0.01; ns: no significant, n=3.

**Supplementary Table S1**. Primers used for real-time qPCR assay.

| Gene | Species | Primers(FW) 5’-3’ | Primers(RW) 5’-3’ |
| --- | --- | --- | --- |
| TNF-α | Mouse | CAGGGGCCACCACGCTC TTC | TTTGTGAGTGTGAGGGTCTGG |
| IL-6 | Mouse | GAGGATACCACTCCCAACAGACC | AAGTGCATCATCGTTGTTCATACA |
| β-actin | Mouse | CCGTGAAAAGATGACCCAGA | TACGACCAGAGGCATACAG |
